# Supplementary material for: Effective strategies to reduce commercial tobacco use in Indigenous communities globally: A systematic review
Source: Springer Nature journal article supplement (doi:10.1186/s12889-015-2645-x), 2015-12-01
Supplement: MOESM1 [file 9751128]

## Additional File 1: Search Strategy

Database: Embase <1980 to 2014 Week 45>

---

- 1 exp indigenous people/ or exp American Indian/ or exp Aborigine/ (15607)
- 2 exp Eskimo/ (2597)
- 3 exp Inuit/ (86)
- 4 exp Metis/ (9)
- 5 (aborigin\* or native or "north american indian" or inuit or inuk or "first nations" or "native canadian" or "native american").mp. [mp=title, abstract, subject headings, heading word, drug trade name, original title, device manufacturer, drug manufacturer, device trade name, keyword] (177628)
- 6 (maori or "pacific islander" or "native Alaska\*" or "alaska Native\*" or "native hawaiian\*" or "torres strait islander\*" or yupik or aleut).mp. [mp=title, abstract, subject headings, heading word, drug trade name, original title, device manufacturer, drug manufacturer, device trade name, keyword] (8191)
- 7 1 or 2 or 3 or 4 or 5 or 6 (197602)
- 8 exp paternal smoking/ or exp "smoking and smoking related phenomena"/ or exp parental smoking/ or exp adolescent smoking/ or exp maternal smoking/ or exp smoking/ or exp smoking habit/ or exp passive smoking/ (214244)
- 9 exp tobacco dependence/ or exp "tobacco use"/ or exp tobacco consumption/ (210987)
- 10 exp smoking cessation program/ or exp smoking ban/ or exp smoking cessation/ or exp smoking regulation/ (39557)
- 11 ("smoking prevention" or "tobacco control" or "smoking reduction" or intervention or program or initiative or "program evaluation" or "tobacco reduction").mp. [mp=title, abstract, subject headings, heading word, drug trade name, original title, device manufacturer, drug manufacturer, device trade name, keyword] (1121907)
- 12 (tax\* or "smoking restriction\*" or "tobacco reduction strateg\*" or "tobacco control strateg\*" or "quit smoking").mp. [mp=title, abstract, subject headings, heading word, drug trade name, original title, device manufacturer, drug manufacturer, device trade name, keyword] (133978)
- 13 8 or 9 (222994)
- 14 10 or 11 or 12 (1270799)
- 15 7 and 13 and 14 (607)
- 16 limit 15 to yr="1994 - 2014" (595)
- 17 **Selected references (313)**
